# Supplementary material
Source: publisher site journal article supplement (https://www.dovepress.com/article/470550)
Supplement: Supplementary file 1 [file get_supplementary_file.php]

**supplementary text**

**supplementary text 1**

Patients with HCC were included in the study by the following inclusion and exclusion criteria.

**Inclusion criteria**

1. diagnosis of HCC based on the histopathological confirmation or EASL/AASLD treatment guidelines;
2. patients treated with hepatectomy or TACE and followed up.

**Exclusion criteria**

1. patients received other systemic or local antitumor therapy (such as chemotherapy, immunotherapy, and ablation) before the treatment;
2. patients did not receive CT or performed CT more than 1 month before hepatectomy;
3. poor quality and motion artifacts of medical images of patients;
4. patients with incomplete laboratory examinations, demographic information, and follow-up data.

**Supplementary text 2**

The clinical characteristics of this study include the following parameters:

1. demographics characteristics: age, gender, HBV infection; diabetes, extrahepatic metastases, portal vein tumor thrombus;
2. laboratory variables: alanine aminotransferase (ALT), serum albumin (ALB), prothrombin time (PT), international normalized ratio (INR), glutamyl transpeptidase (GGT), total bilirubin (TBIL), platelet count (PLT), serum creatinine (sCr), aspartate aminotransferase (AST);
3. clinical grading parameters: albumin-bilirubin (ALBI) grade, Child-Pugh, Eastern Cooperative Oncology Group Performance Status (ECOG-PS) and China Liver Cancer (CNLC) staging.
4. radiological characteristics: tumor diameter, tumor location (right, left, or across), tumor number, cirrhosis (present or absent), fusion lesions (present or absent), HCC capsule (absent, unintegral, integral, or breakthrough), intra-tumoral necrosis (absent or present) and arterial peritumoral enhancement (absent or present).

The radiological characteristics were independently evaluated by two physicians.

**Supplementary text 3**

**Propensity Score Matching**

The subjective judgment of the clinician could influence the choice of treatment regimen. Propensity score matching was taken for patients to ensure that the survival time was influenced by treatment regimen rather than confounding factors. The correlation coefficients of baseline characteristics with the treatment regimen, survival time, and survival status were calculated. The results showed that CNLC (I, II, or III), Extrahepatic Metastases (absent or present), Portal Vein Tumor Thrombus (absent or present), Tumor number (1, 2, 3, or >3), ALBI grade (1 or 2), Cirrhosis (absent or present), and ALB were significantly correlated with the treatment regimen, survival time, and survival status (p < 0.05). The supplementary table1 shows the correlation coefficients of the baseline features. The above significantly correlated baseline characteristics were used as matching characteristics. A nonparametric matching method was used to screen out patients with similar matching characteristics in the hepatectomy and TACE groups at a ratio of 1:1. PSM was implemented through the "Matching" software package (R package), and 120 patients (60 in the surgical group and 60 in the TACE group) were selected for matching. The supplementary table2 shows no significant differences in baseline clinical characteristics between treatment groups. The matched 120 patients were used as an independent test cohort.

**Inverse Probability of Treatment Weighting**

Patients who were not matched were corrected for confounders by inverse probability of treatment weighting (IPTW), which converged the internal confounding distribution between treatment groups. The above matching characteristics are used as confounding factors that need to be balanced. Propensity score models were constructed by logistic regression with treatment regimen as the dependent variable and confounding factors as independent variables. The propensity score (PS) (probability that a patient will undergo hepatectomy treatment) was calculated for each patient. Each patient was weighted using PS: weight=1/PS (the hepatectomy group) and weight=1/(1-PS) (the TACE group). The supplementary table3 shows no significant differences in baseline clinical characteristics between treatment groups after IPTW treatment. The bias due to confounding factors was controlled. Therefore, the efficacy of the hepatectomy and TACE groups was comparable. The IPTW-weighted patients were used as the training cohort.

**Supplementary text 4**

Overall survival (OS) is defined as the time from the start of the first treatment (hepatectomy or TACE treatment) to death from any no-accidental cause or the last follow-up.

After hepatectomy or TACE, patients were followed up every 3 months during the first year, every 6 months during the second year, and every 6-12 months during the third year and beyond. The follow-up examinations include liver function tests, ultrasound, abdominal CT/MRI, and other necessary laboratory variables. The last follow-up visit is in December 2021.

**Supplementary text 5**

All patients underwent the standard enhanced abdominal CT scan within one month before surgery. 60 ml of contrast agent was injected intravenously with a high-pressure syringe at a flow rate of 3.0-3.5 ml/s. Images of the arterial and portal phases were acquired after 30 and 60 seconds, respectively.

**Supplementary text 6**

**pre-processing details**

To reduce heterogeneity among CT images, in the pre-processing, all the images were resampled to an isotropic voxel size (1x1x1mm3) using bilinear interpolation, and intensities were normalized with a fixed bin width (25HU).

**segmentation details**

The patient's enhanced abdominal CT images (arterial and portal phase) are exported from the picture archiving and communication system (PACS) in Digital Imaging and Communications in Medicine (DICOM) format. The region of interest (ROI) for each patient was segmented by two radiologists without knowledge of each patient's clinical history and survival status.

ROIs include tumor area and peritumor area of the arterial and portal phases. The tumoral ROI was considered to the entire tumor volume, and the peritumoral ROI was considered to be the peritumoral tissues. The preprocessed images were imported into the 3D Slicer software (http://www.slicer.org), in which, the radiologists indicated the ROIs in each transverse section along the tumor border. The peritumor ROIs were automatically reconstructed using the erosion and dilation technique, expanding 3 mm and 5 mm outward from the tumor perimeter. Six ROIs were obtained: tumoral ROI of the arterial phases (A), tumoral ROI of the portal phases (P), peritumoral 3 mm ROI of the arterial phases (A3), peritumoral 3 mm ROI of the portal phases (P3), peritumoral 5 mm ROI of the arterial phases (A5), peritumoral 5 mm ROI of the portal phases (P5).

**segmentation reproducibility assessment**

The intraclass correlation coefficient (ICC) was used to assess the reliability of radiomics features influenced by image segmentation. Twenty patients were randomly selected, and two radiologists segmented the ROIs simultaneously and then calculated the ICC (ICC inter). After one month, the ROIs of the above 20 patients were segmented again by a radiologist and then calculated the ICC (ICC intra).

**Supplementary text 7**

The extracted radiomics features are divided into two groups: features based on the original image and features based on the filtered image. Based on the original image features, 14 shape features, 18 first-order features, and 75 texture features are extracted, a total of 107 features. Texture features include 24 GLCM features, 14 GLDM features, 16 GLRLM features, 16 GLSZM features, and 5 NGTDM features. For the features based on filtered images, we use 3D wavelet transform and log transform to decompose the original image into 8 and 5 filtered images respectively and extract first-order statistical features and texture features. Finally, for each ROI, we extracted 1316 image omics features. See the webpage for the calculation formula of each feature: <https://pyradiomics.readthedocs.io/en/latest/features.html>.

**Supplementary text 8**

The Deathhepatectomy and DeathTACE models were constructed for patients in two treatment regimens (hepatectomy and TACE groups) to predict patient’s survival status. The selected clinical characteristics and radiomics features were used to construct the corresponding machine learning models. The specific process of feature selection and the types of machine learning models are shown below.

**Deathhepatectomy model**

The random survival forest (RSF) was used to select features with prediction accuracy greater than 0 for each experiment, and the experiment was repeated 100 times. Features that were selected 80 times and above were used as predictors of treatment options.

Among the clinical characteristics, Survival time, Portal Vein Tumor Thrombus, Cirrhosis, Fusion lesions, Intratumoral necrosis, Tumor number, Tumor diameter, age and ALB were used as predictors of treatment options. The results of the radiomics features with different ROIs (A, P, A3, P3, A5, and P5) after feature selection are shown in supplementary table 6. The Radscores were calculated by linear multiplication of the features and weights (Radscore_A, Radscore_P, Radscore_A3, Radscore_P3, Radscore_A5, and Radscore_P5).

The selected clinical characteristics and the radiomics features with different Radscores were combined to construct different random forest models. The areas under the curves of the receiver operating characteristics (AUC), F1 score, Precision, Sensitivity, Specificity, and Accuracy were used to compare the performance of the above models. The model with the best performance was selected as the Deathhepatectomy model. Table 1 shows the performances of the different models in the hepatectomy and TACE groups. The result shows that the model built by combining clinical characteristics, Radscore_A3 and Radscore_P has the best performance.

**DeathTACE model**

The least absolute shrinkage and selection operator (LASSO) regression analysis was used to select features, and the 10-fold cross-validation was used for verification.

Among the clinical characteristics, Survival time, Portal Vein Tumor Thrombus, ALT, age and ALB were used as predictors of treatment options. The results of the radiomics features with different ROIs after feature selection are shown in supplementary table 6.

The selected clinical characteristics and the radiomics features with different Radscores were combined to construct different Logical regression models. The model with the best performance was selected as the DeathTACE model. Table 1 shows the performances of the different models in the hepatectomy and TACE groups. The result shows that the model built by combining clinical characteristics and Radscore_A5 has the best performance.

**Supplementary text 9**

We used the accelerate failure time model (AFT) to construct the prognostic model. Since the failure times have different distribution patterns, we used the AFT model with Weibull distribution to analyze the effect of the selected features on the overall survival time. The performance of the model was evaluated using the Akaike information criteria (AIC), and high-risk and low-risk median survival times were calculated for different AFT models. The best AFT model was selected by comparing the patient's high and low risk outcomes with the patient's actual survival status. To obtain the formula of the optimal AFT model, the Time ratio, standard error, z-value, and p-value of each covariate are calculated in the model.

**Supplementary Table**

**Supplementary Table1. Correlation coefficients of matching characteristics with treatment, survival time and survival status**

| Matching characteristics | Treatment | Status | Survival time |
| --- | --- | --- | --- |
| CNLC | -0.276 | 0.332 | -0.339 |
| Extrahepatic Metastases | -0.020 | 0.060 | -0.097 |
| Portal Vein Tumor Thrombus | -0.260 | 0.293 | -0.245 |
| Tumor number | -0.206 | 0.188 | -0.253 |
| ALBI grade | -0.249 | 0.218 | -0.235 |
| Cirrhosis | -0.101 | 0.138 | -0.094 |
| ALB | 0.217 | -0.204 | 0.213 |

**Abbreviations:** CNLC, China Liver Cancer Staging; ALBI, albumin-bilirubin; ALB, serum albumin.

**Supplementary Table2.** **Characteristics differences between treatment after matching**

| Group | TACE  (n=60) | Hepatectomy (n=60) | Pvalue | SMD |
| --- | --- | --- | --- | --- |
| CNLC (%) |  |  | 1.000 | <0.001 |
| I | 24(40.0%) | 24(40.0%) |  |  |
| II | 19(31.7%) | 19(31.7%) |  |  |
| III | 17(28.3%) | 17(28.3%) |  |  |
| Child Pugh class =B (%) | 10 (16.7%) | 6 (10.0%) | 0.420 | 0.197 |
| ECOG PS (%) |  |  | 0.408 | 0.246 |
| 0 | 7 (11.7%) | 9 (15.0%) |  |  |
| 1 | 51 (85.0%) | 46 (76.7%) |  |  |
| 2 | 2 (3.3%) | 5 (8.3%) |  |  |
| Extrahepatic Metastases = Present (%) | 2 (3.3%) | 2 (3.3%) | 1.000 | <0.001 |
| Portal Vein Tumor Thrombus = 1 (%) | 15 (25.0%) | 15 (25.0%) | 1.000 | <0.001 |
| Tumor number (%) |  |  | 1.000 | <0.001 |
| 1 | 32 (53.3%) | 32 (53.3%) |  |  |
| 2 | 7 (11.7%) | 7 (11.7%) |  |  |
| 3 | 2 (3.3%) | 2 (3.3%) |  |  |
| >3 | 19 (31.7%) | 19 (31.7%) |  |  |
| Age (mean±standard deviation) | 61.27±11.98 | 58.28±11.92 | 0.174 | 0.250 |
| Gender = Female (%) | 9 (15.0%) | 11 (18.3%) | 0.806 | 0.090 |
| HBV infection = Present (%) | 46 (76.7%) | 45 (75.0%) | 1.000 | 0.039 |
| Diabetes mellitus = Present (%) | 7 (11.7%) | 6 (10.0%) | 1.000 | 0.054 |
| ALBI stage = 2 (%) | 44 (73.3%) | 44 (73.3%) | 1.000 | <0.001 |
| Cirrhosis = Present (%) | 12 (20.0%) | 12 (20.0%) | 1.000 | <0.001 |
| ALB (mean±standard deviation) | 38.28±4.36 | 38.21±4.29 | 0.925 | 0.017 |

**Abbreviations:** TACE, transcatheter arterial chemoembolization; CNLC, China Liver Cancer Staging; HBV, hepatitis B virus; ALBI, albumin-bilirubin; ALB, serum albumin.

**Supplementary Table3. Characteristics differences between treatment** **before IPTW versus after IPTW**

| Group | Before IPTW | | |  | After IPTW | | |
| --- | --- | --- | --- | --- | --- | --- | --- |
| TACE  (n=91) | Hepatectomy (n=207) | P value |  | TACE  (n=273.6) | Hepatectomy (n=308.7) | P value |
| CNLC (%) |  |  | <0.001 |  |  |  | 0.241 |
| I | 14 (15.4%) | 111 (53.6%) |  |  | 81.3 (29.7%) | 125.5 (40.6%) |  |
| II | 26 (28.6%) | 54 (26.1%) |  |  | 101.5 (37.1%) | 79.1 (25.6%) |  |
| III | 51 (56.0%) | 42 (20.3%) |  |  | 90.8 (33.2%) | 104.2 (33.7%) |  |
| Child.Pugh.class = B (%) | 29 (31.9%) | 24 (11.6%) | <0.001 |  | 57.6 (21.0) | 58.4 (18.9) | 0.776 |
| ECOG.PS (%) |  |  | 0.300 |  |  |  | 0.471 |
| 0 | 13 (14.3%) | 38 (18.4%) |  |  | 48.6 (17.8%) | 70.1 (22.7%) |  |
| 1 | 73 (80.2%) | 164 (79.2%) |  |  | 209.9 (76.7%) | 231.6 (75.0%) |  |
| 2 | 5 ( 5.5%) | 5 ( 2.4%) |  |  | 15.1 ( 5.5%) | 7.0 ( 2.3%) |  |
| Extrahepatic Metastases = Present (%) | 8 ( 8.8%) | 13 ( 6.3%) | 0.593 |  | 19.7 ( 7.2%) | 21.2 ( 6.9%) | 0.923 |
| Portal Vein Tumor Thrombus = Present (%) | 46 (50.5%) | 30 (14.5%) | <0.001 |  | 76.8 (28.1%) | 84.4 (27.4%) | 0.924 |
| Tumor number (mean±standard deviation) | 3.44±2.18 | 2.14±1.78 | <0.001 |  | 2.91±2.07 | 2.74 (2.10) | 0.643 |
| Age (mean±standard deviation) | 56.88±13.87 | 57.46±11.02 | 0.700 |  | 57.54±14.58 | 56.40±10.87 | 0.594 |
| Gender = Female (%) | 15 (16.5%) | 28 (13.5%) | 0.624 |  | 53.5 (19.6%) | 41.1 (13.3%) | 0.257 |
| HBV infection = Present (%) | 72 (79.1%) | 162 (78.3%) | 0.989 |  | 204.9 (74.9%) | 245.5 (79.5%) | 0.471 |
| Diabetes mellitus = Present (%) | 8 ( 8.8%) | 15 ( 7.2%) | 0.822 |  | 17.8 ( 6.5%) | 21.5 ( 7.0%) | 0.884 |
| ALBI stage(%) |  |  | <0.001 |  |  |  | 0.512 |
| 1 | 20 (22.0%) | 111 (53.6%) |  |  | 104.2 (38.1%) | 133.7 (43.3%) |  |
| 2 | 60 (65.9%) | 90 (43.5%) |  |  | 152.7 (55.8%) | 143.8 (46.6%) |  |
| 3 | 11 (12.1%) | 6 ( 2.9%) |  |  | 16.7 ( 6.1%) | 31.2 (10.1%) |  |
| Cirrhosis = Present(%) | 39 (42.9%) | 53 (25.6%) | 0.005 |  | 90.2 (33.0%) | 103.5 (33.5%) | 0.946 |
| ALB (mean±standard deviation) | 36.03±6.19 | 39.91±5.91 | <0.001 |  | 38.13±6.83 | 37.87±7.54 | 0.873 |

**Abbreviations:** IPTW, Inverse Probability of Treatment Weighting; TACE, transcatheter arterial chemoembolization; CNLC, China Liver Cancer Staging; HBV, hepatitis B virus; ALBI, albumin-bilirubin; ALB, serum albumin.

**Supplementary Table 4. CT imaging sequence**

| Scanner | Scanning parameters | | | | | | |  | Contrast agent parameters | | | |
| --- | --- | --- | --- | --- | --- | --- | --- | --- | --- | --- | --- | --- |
| TV (kV) | TC (mA) | RT (s) | CW  (mm) | FOV (mm) | Matrix | ST  (mm) |  | Rate  (ml/s) | Dose  (ml) | APT  (S) | PPT  (S) |
| Philips Brilliance | 120 | 142 | 0.750 | 128×0.625 | 300×300 | 512×512 | 5 |  | 3.0-3.5 | 45-60 | 25-30 | 45-60 |
| GE Lightspeed VCT | 120 | 250 | 0.500 | 64×0.625 | 500×500 | 1024×1024 | 5 |  | 3.0-3.5 | 45-60 | 25-30 | 45-60 |
| Siemens Definition AS | 120 | 200 | 0.500 | 64×0.625 | 350×350 | 512×512 | 5 |  | 3.0-3.5 | 45-60 | 25-30 | 45-60 |

**Abbreviations:** TV, tube voltage; TC, tube current; RT, rotation time;CW, collimation width; FOV, field of view; ST, slice thickness; APT, arterial phase scan time (Time after contrast injection); PPT, portal phase scan time (Time after contrast injection).

| Features | Train cohort | | | Test cohort | | |
| --- | --- | --- | --- | --- | --- | --- |
| Survivor(n=142) | Non-survivor(n=156) | P value | Survivor(n=41) | Non-survivor(n=79) | *P*value |
| Survival time (Median[Q1~Q3]) | 536[268.5~1153.75] | 219[131~400.25] | <0.001 | 359[251~864] | 218[135~367] | 0.001* |
| Treatment model (%) |  |  | <0.001 |  |  | 0.847 |
| TACE | 19 (13.4%) | 72 (46.2%) |  | 20 (48.8%) | 40 (50.6%) |  |
| Hepatectomy | 123 (86.6%) | 84 (53.8%) |  | 21 (51.2%) | 39 (49.4%) |  |
| CNLC (%) |  |  | <0.001 |  |  | 0.045 |
| I stage | 84 (59.2%) | 41 (26.2%) |  | 21 (51.2%) | 27 (34.2%) |  |
| II stage | 37 (26.1%) | 43 (27.6%) |  | 14 (34.2%) | 24 (30.4%) |  |
| III stage | 21 (14.7%) | 72 (46.2%) |  | 6 (14.6%) | 28 (35.4%) |  |
| Child Pugh class (%) |  |  | 0.012 |  |  | 0.792 |
| A | 125 (88.0%) | 120 (76.9%) |  | 36 (87.8%) | 68 (86.1%) |  |
| B | 17 (12.0%) | 36 (23.1%) |  | 5 (12.2%) | 11 (13.9%) |  |
| ECOG-PS (%) |  |  | 0.691 |  |  | 0.564 |
| 0 | 27 (19.0%) | 24 (15.4%) |  | 5 (12.2%) | 11 (13.9%) |  |
| 1 | 110 (77.5%) | 127 (81.4%) |  | 32 (78.0%) | 65 (82.3%) |  |
| 2 | 5 (3.5%) | 5 (3.2%) |  | 4 (9.8%) | 3 (3.8%) |  |
| Extrahepatic Metastases (%) |  |  | 0.173 |  |  | 1.000 |
| Absent | 135 (95.1%) | 142 (91.0%) |  | 40 (97.6%) | 76 (96.2%) |  |
| Present | 7 (4.9%) | 14 (9.0%) |  | 1 (2.4%) | 3 (3.8%) |  |
| Portal Vein Tumor Thrombus (%) |  |  | <0.001 |  |  | 0.020* |
| Absent | 127 (89.4%) | 95 (60.9%) |  | 36 (87.8%) | 54 (68.4%) |  |
| Present | 15 (10.6%) | 61 (39.1%) |  | 5 (12.2%) | 25 (31.6%) |  |
| Gender (%) |  |  | 0.623 |  |  | 0.031 |
| Male | 123 (86.6%) | 132 (84.6%) |  | 30 (73.2%) | 70 (88.6%) |  |
| Female | 19 (13.4%) | 24 (15.4%) |  | 11 (26.8%) | 9 (11.4%) |  |
| HBV infection (%) |  |  | 0.323 |  |  | 0.624 |
| Absent | 27 (19.0%) | 37 (23.7%) |  | 11 (26.8%) | 18 (22.8%) |  |
| Present | 115 (81.0%) | 119 (76.3%) |  | 30 (73.2%) | 61 (77.2%) |  |
| Diabetes mellitus (%) |  |  | 0.677 |  |  | 1.000 |
| Absent | 132 (93.0%) | 143 (91.7%) |  | 37 (90.2%) | 70 (88.6%) |  |
| Present | 10 (7.0%) | 13 (8.3%) |  | 4 (9.8%) | 9 (11.4%) |  |
| ALBI grade (%) |  |  | 0.001 |  |  | 0.008* |
| 1 | 78 (55.0%) | 53 (34.0%) |  | 17 (41.5%) | 15 (19.0%) |  |
| 2 | 58 (40.8%) | 92 (59.0%) |  | 24 (58.5%) | 64 (81.0%) |  |
| 3 | 6 (4.2%) | 11 (7.0%) |  | 0 (0.0%) | 0 (0.0%) |  |
| Cirrhosis (%) |  |  | 0.007 |  |  | 0.124 |
| Absent | 109 (76.8%) | 97 (62.2%) |  | 36 (87.8%) | 60 (75.9%) |  |
| Present | 33 (23.2%) | 59 (37.8%) |  | 5 (12.2%) | 19 (24.1%) |  |
| Tumor location (%) |  |  | <0.001 |  |  | 0.084 |
| Left | 53 (37.3%) | 28 (17.9%) |  | 18 (43.9%) | 21 (26.6%) |  |
| Right | 78 (55.0%) | 95 (60.9%) |  | 14 (34.1%) | 43 (54.4%) |  |
| Across | 11 (7.7%) | 33 (21.2%) |  | 9 (22.0%) | 15 (19.0%) |  |
| Fusion lesions (%) |  |  | <0.001 |  |  | 0.131 |
| Absent | 94 (66.2%) | 68 (43.6%) |  | 22 (53.7%) | 31 (39.2%) |  |
| Present | 48 (33.8%) | 88 (56.4%) |  | 19 (46.3%) | 48 (60.8%) |  |
| HCC capsule (%) |  |  | <0.001 |  |  | 0.682 |
| Absent | 36 (25.4%) | 50 (32.1%) |  | 15 (36.5%) | 25 (31.6%) |  |
| Integral | 74 (52.1%) | 39 (25.0%) |  | 13 (31.7%) | 25 (31.6%) |  |
| Unintegral | 22 (15.5%) | 47 (30.1%) |  | 11 (26.8%) | 18 (22.8%) |  |
| HCC capsule breakthrough | 10 (7.0%) | 20 (12.8%) |  | 2 (5.0%) | 11 (14.0%) |  |
| Intratumoral necrosis (%) |  |  | 0.008 |  |  | 0.053 |
| Absent | 67 (47.2%) | 50 (32.1%) |  | 15 (36.6%) | 16 (20.3%) |  |
| Present | 75 (52.8%) | 106 (67.9%) |  | 26 (63.4%) | 63 (79.7%) |  |
| Arterial peritumoral enhancement (%) |  |  | 0.143 |  |  | 0.680 |
| Absent | 59 (41.5%) | 52 (33.3%) |  | 8 (19.5%) | 18 (22.8%) |  |
| Present | 83 (58.5%) | 104 (66.7%) |  | 33 (80.5%) | 61 (77.2%) |  |
| Tumor number (Median[Q1~Q3]) | 1[1~2] | 2[1~6] | <0.001 | 1[1~6] | 1[1~6] | 0.818 |
| Tumor diameter (Median[Q1~Q3]) | 4.95[3.4~7.95] | 8.1[5.575~11.125] | <0.001 | 6.4[5.3~9.3] | 9[6.75~11.3] | 0.012* |
| Age(Median[Q1~Q3]) | 56.5[49~65.75] | 59[47~67] | 0.988 | 61.854 ± 10.862 | 58.696 ± 12.472 | 0.155 |
| PLT(Median[Q1~Q3]) | 130.5[97.25~192.75] | 145.5[96~209] | 0.211 | 160[133~197] | 141.5[105.5~192.75] | 0.292 |
| AST(Median[Q1~Q3]) | 44[29~60.75] | 65.5[35.6~124] | <0.001 | 46[35~63] | 66.4[46.4~95.5] | 0.001* |
| ALT(Median[Q1~Q3]) | 35[23.175~57] | 40[24~68.25] | 0.324 | 36[24~49] | 39[26.5~63] | 0.274 |
| GGT(Median[Q1~Q3]) | 59.55[34~144] | 135[64~244.5] | <0.001 | 97[64~224] | 183[100.65~362] | 0.007* |
| ALB(Median[Q1~Q3]) | 41.5[36.8~44.375] | 37.8[33.625~41.175] | <0.001 | 39.6[35.5~42.1] | 37[35.85~39.7] | 0.174 |
| TBIL(Median[Q1~Q3]) | 15.85[12.375~24.025] | 17.8[13.5~26.025] | 0.070 | 16[12.6~22.5] | 21.2[14.2~25.5] | 0.046 |
| Scr(Median[Q1~Q3]) | 68[57.05~75.25] | 64.5[55.2~75] | 0.233 | 65.3[55.15~73.425] | 66.95[57.675~80.375] | 0.316 |
| PT(Median[Q1~Q3]) | 13.7[13.2~14.4] | 13.9[13.1~14.725] | 0.091 | 13.8[13.2~14.2] | 13.9[13.5~14.7] | 0.100 |
| INR(Median[Q1~Q3]) | 1.06[1.01~1.12] | 1.08[1.01~1.16] | 0.119 | 1.06[1.03~1.11] | 1.085[1.03~1.16] | 0.256 |

**Supplementary Table 5. Baseline clinical characteristics of the patients**

**Abbreviations:** ALB, serum albumin; ALBI, albumin-bilirubin; ALT, alanine aminotransferase; AST, aspartate aminotransferase; CNLC, China Liver Cancer Staging; ECOG-PS, Eastern Cooperative Oncology Group performance status; GGT, Glutamyl transpeptidase; HBV, hepatitis B virus; INR, international normalized ratio; PLT, platelet count; PT, prothrombin time; Scr, serum creatinine; and TBIL, total bilirubin.

**Supplementary Table 6. Radiomics features with different ROIs after feature selection.**

| Treatment | ROI | Radiomics features | Coefficient |
| --- | --- | --- | --- |
| Hepatectomy | A | log.sigma.0.5.mm.3DglszmGrayLevelNonUniformity | 0.001749227 |
| Hepatectomy | A | log.sigma.1.5.mm.3DglszmLargeAreaHighGrayLevelEmphasis | -0.000124003 |
| Hepatectomy | A | log.sigma.2.5.mm.3DglszmGrayLevelNonUniformity | 0.002557318 |
| Hepatectomy | A | wavelet.LHHglrlmLongRunEmphasis | 0.008963144 |
| Hepatectomy | A | wavelet.LHHglszmLargeAreaHighGrayLevelEmphasis | 0.006905943 |
| Hepatectomy | A | wavelet.LLHglszmGrayLevelNonUniformity | 0.00089536 |
| Hepatectomy | A | wavelet.HLHglszmSizeZoneNonUniformity | 0.003664265 |
| Hepatectomy | A | wavelet.LLLfirstorderTotalEnergy | 0.00194939 |
| Hepatectomy | A | originalfirstorderMean | 0.000413138 |
| Hepatectomy | A | originalglszmZoneEntropy | 0.000723657 |
| Hepatectomy | A | originalngtdmCoarseness | 0.000733767 |
| Hepatectomy | A3 | log.sigma.0.5.mm.3DglcmContrast | 0.002181474 |
| Hepatectomy | A3 | log.sigma.1.0.mm.3DglszmZoneEntropy | 0.004721246 |
| Hepatectomy | A3 | log.sigma.1.0.mm.3DngtdmStrength | 0.003712894 |
| Hepatectomy | A3 | log.sigma.2.5.mm.3DglszmGrayLevelNonUniformity | 0.00429963 |
| Hepatectomy | A3 | wavelet.HLLgldmDependenceEntropy | 0.001906947 |
| Hepatectomy | A3 | wavelet.LHLfirstorderTotalEnergy | 0.006122715 |
| Hepatectomy | A3 | wavelet.LHLfirstorder90Percentile | 0.002555224 |
| Hepatectomy | A3 | wavelet.LHHglcmSumEntropy | 0.002493544 |
| Hepatectomy | A3 | wavelet.LLHglszmSizeZoneNonUniformity | 0.003175686 |
| Hepatectomy | A3 | wavelet.HHHgldmDependenceNonUniformityNormalized | 0.000675636 |
| Hepatectomy | A3 | wavelet.HHLgldmDependenceEntropy | 0.002311291 |
| Hepatectomy | A3 | wavelet.HHLglszmZoneEntropy | 0.004119549 |
| Hepatectomy | A3 | wavelet.LLLglcmInverseVariance | 0.00222406 |
| Hepatectomy | A3 | wavelet.LLLglszmZoneEntropy | 0.001115988 |
| Hepatectomy | A3 | originalngtdmCoarseness | 0.004021831 |
| Hepatectomy | A5 | originalshapeMaximum2DDiameterSlice | 0.000930205 |
| Hepatectomy | A5 | log.sigma.0.5.mm.3DgldmDependenceEntropy | 0.000400823 |
| Hepatectomy | A5 | log.sigma.0.5.mm.3DfirstorderRange | 0.000869448 |
| Hepatectomy | A5 | log.sigma.1.0.mm.3DglszmZoneEntropy | 0.000982645 |
| Hepatectomy | A5 | log.sigma.2.5.mm.3DngtdmContrast | -0.000435399 |
| Hepatectomy | A5 | wavelet.LHLfirstorderTotalEnergy | 0.002227159 |
| Hepatectomy | A5 | wavelet.LHHglcmSumEntropy | 0.000655787 |
| Hepatectomy | A5 | wavelet.HLHglszmLargeAreaEmphasis | -5.54E-05 |
| Hepatectomy | A5 | wavelet.HHHglszmZoneVariance | 0.001623724 |
| Hepatectomy | A5 | wavelet.HHLglszmGrayLevelNonUniformity | 0.001589776 |
| Hepatectomy | A5 | wavelet.LLLglcmInverseVariance | 0.001055271 |
| Hepatectomy | A5 | wavelet.LLLglszmZoneEntropy | 0.002051803 |
| Hepatectomy | A5 | originalgldmDependenceVariance | 0.001799195 |
| Hepatectomy | A5 | originalngtdmCoarseness | 0.000930577 |
| Hepatectomy | P | originalshapeMaximum2DDiameterSlice | 0.001292639 |
| Hepatectomy | P | log.sigma.0.5.mm.3DglszmSizeZoneNonUniformity | 0.000219537 |
| Hepatectomy | P | log.sigma.2.0.mm.3DngtdmCoarseness | 0.000519643 |
| Hepatectomy | P | log.sigma.2.0.mm.3DngtdmContrast | 0.000627454 |
| Hepatectomy | P | log.sigma.2.5.mm.3DglszmGrayLevelNonUniformity | 0.000623737 |
| Hepatectomy | P | log.sigma.2.5.mm.3DngtdmContrast | 0.000460932 |
| Hepatectomy | P | wavelet.HLLglszmLargeAreaEmphasis | 0.00154531 |
| Hepatectomy | P | wavelet.LHLglcmDifferenceAverage | 0.001374304 |
| Hepatectomy | P | wavelet.LHHglszmSizeZoneNonUniformity | 0.000216802 |
| Hepatectomy | P | wavelet.LLHglszmGrayLevelNonUniformity | 0.001589576 |
| Hepatectomy | P | wavelet.HHHglcmMCC | -0.00043061 |
| Hepatectomy | P | wavelet.HHHglszmLargeAreaHighGrayLevelEmphasis | 0.001920684 |
| Hepatectomy | P | wavelet.HHLglszmSizeZoneNonUniformityNormalized | -0.000547045 |
| Hepatectomy | P | wavelet.LLLglcmMaximumProbability | 0.000413886 |
| Hepatectomy | P | originalgldmDependenceEntropy | 0.000299493 |
| Hepatectomy | P | originalglszmGrayLevelNonUniformity | 9.86E-05 |
| Hepatectomy | P | originalglszmZoneEntropy | 0.000821402 |
| Hepatectomy | P | log.sigma.1.5.mm.3DglszmZoneEntropy | 0.000622288 |
| Hepatectomy | P3 | originalshapeMajorAxisLength | 0.003284752 |
| Hepatectomy | P3 | originalshapeSurfaceArea | 0.000897811 |
| Hepatectomy | P3 | log.sigma.0.5.mm.3DfirstorderTotalEnergy | 0.005161024 |
| Hepatectomy | P3 | log.sigma.0.5.mm.3DngtdmContrast | 0.000539416 |
| Hepatectomy | P3 | log.sigma.2.0.mm.3DgldmLowGrayLevelEmphasis | -0.000628855 |
| Hepatectomy | P3 | log.sigma.2.0.mm.3DglszmLowGrayLevelZoneEmphasis | -0.000406824 |
| Hepatectomy | P3 | wavelet.LLHglszmGrayLevelNonUniformity | 0.000477344 |
| Hepatectomy | P3 | wavelet.HHHngtdmStrength | 0.00110187 |
| Hepatectomy | P3 | wavelet.HHLfirstorderTotalEnergy | 0.001146188 |
| Hepatectomy | P3 | wavelet.HHLngtdmContrast | -0.000150906 |
| Hepatectomy | P3 | wavelet.LLLglszmSizeZoneNonUniformity | -0.000688233 |
| Hepatectomy | P3 | originalngtdmCoarseness | 0.005006273 |
| Hepatectomy | P3 | log.sigma.0.5.mm.3DglszmGrayLevelVariance | 0.000193657 |
| Hepatectomy | P5 | originalshapeMaximum2DDiameterSlice | 0.000932616 |
| Hepatectomy | P5 | log.sigma.0.5.mm.3DglszmSizeZoneNonUniformity | 0.000398888 |
| Hepatectomy | P5 | log.sigma.0.5.mm.3DglszmLargeAreaHighGrayLevelEmphasis | -0.000135668 |
| Hepatectomy | P5 | log.sigma.0.5.mm.3DngtdmContrast | 0.000120058 |
| Hepatectomy | P5 | log.sigma.1.0.mm.3DfirstorderKurtosis | 0.000396103 |
| Hepatectomy | P5 | log.sigma.1.5.mm.3DglszmZoneEntropy | 0.001129183 |
| Hepatectomy | P5 | log.sigma.2.0.mm.3DgldmSmallDependenceLowGrayLevelEmphasis | -0.000540168 |
| Hepatectomy | P5 | wavelet.LHLgldmLargeDependenceEmphasis | 0.000877883 |
| Hepatectomy | P5 | wavelet.LLHglcmId | 0.000895215 |
| Hepatectomy | P5 | wavelet.LLHglszmGrayLevelNonUniformity | 0.00096032 |
| Hepatectomy | P5 | wavelet.HHHglszmZoneVariance | 0.001734176 |
| Hepatectomy | P5 | wavelet.HHHglszmLargeAreaLowGrayLevelEmphasis | 0.002189385 |
| Hepatectomy | P5 | wavelet.HHLglszmGrayLevelNonUniformity | 0.001575602 |
| Hepatectomy | P5 | wavelet.LLLglszmZoneEntropy | 0.00052927 |
| TACE | A | log.sigma.0.5.mm.3DgldmDependenceVariance | -0.370188627 |
| TACE | A | log.sigma.1.0.mm.3DglszmGrayLevelNonUniformity | 0.029143541 |
| TACE | A | log.sigma.2.0.mm.3DngtdmContrast | -137.5311255 |
| TACE | A | originalglszmGrayLevelVariance | -0.029802938 |
| TACE | A3 | wavelet.LLHfirstorderRobustMeanAbsoluteDeviation | -0.773428818 |
| TACE | A5 | log.sigma.0.5.mm.3DglcmContrast | -0.315480511 |
| TACE | A5 | log.sigma.2.5.mm.3Dfirstorder90Percentile | 0.18580318 |
| TACE | A5 | log.sigma.2.5.mm.3DglszmLowGrayLevelZoneEmphasis | -1.210909985 |
| TACE | A5 | wavelet.LLHfirstorderRobustMeanAbsoluteDeviation | -0.999549822 |
| TACE | A5 | wavelet.LLHglszmLargeAreaEmphasis | 2.08E-07 |
| TACE | A5 | wavelet.HHLngtdmBusyness | -0.000871975 |
| TACE | P | log.sigma.0.5.mm.3DgldmDependenceVariance | -0.134111236 |
| TACE | P | log.sigma.0.5.mm.3DglcmContrast | -0.044823827 |
| TACE | P | log.sigma.1.0.mm.3DfirstorderKurtosis | -0.008290226 |
| TACE | P | log.sigma.1.5.mm.3DglszmGrayLevelVariance | -0.167203508 |
| TACE | P | log.sigma.2.0.mm.3DngtdmContrast | -40.50913134 |
| TACE | P | log.sigma.2.5.mm.3DglszmGrayLevelNonUniformity | 0.007046129 |
| TACE | P | wavelet.LHHglszmSizeZoneNonUniformity | 0.012068628 |
| TACE | P | wavelet.LLLglcmSumSquares | -0.042366608 |
| TACE | P | wavelet.LLLfirstorderTotalEnergy | 3.86E-12 |
| TACE | P | originalngtdmBusyness | 0.000172284 |
| TACE | P3 | originalshapeLeastAxisLength | 0.010193715 |
| TACE | P3 | log.sigma.0.5.mm.3DgldmGrayLevelVariance | -0.814468792 |
| TACE | P3 | log.sigma.1.5.mm.3DngtdmStrength | -10.60173521 |
| TACE | P3 | log.sigma.2.0.mm.3DglrlmGrayLevelNonUniformityNormalized | 7.184018234 |
| TACE | P3 | log.sigma.2.0.mm.3DngtdmBusyness | -0.006563366 |
| TACE | P3 | wavelet.LHLngtdmBusyness | -0.000830564 |
| TACE | P3 | wavelet.HLHngtdmComplexity | 0.059732175 |
| TACE | P3 | wavelet.HHHglcmMCC | 25.71989648 |
| TACE | P3 | originalfirstorderMeanAbsoluteDeviation | -0.027134856 |
| TACE | P5 | log.sigma.0.5.mm.3DgldmGrayLevelVariance | -1.560903078 |
| TACE | P5 | log.sigma.2.5.mm.3DglszmGrayLevelNonUniformity | 0.004513224 |
| TACE | P5 | log.sigma.2.5.mm.3DngtdmContrast | -105.5888317 |

**Abbreviations:** TACE, transarterial chemoembolization; ROI, region of Interest; A, tumoral ROI of the arterial phases; P, tumoral ROI of the portal phases; A3, peritumoral 3 mm ROI of the arterial phases; P3, peritumoral 3 mm ROI of the portal phases; A5, peritumoral 5 mm ROI of the arterial phases; P5, peritumoral 5 mm ROI of the portal phases.

**Supplementary Table 7. Result of real and counterfactual.**

| Group | Status | CNLC | LR | TACE | LR to TACE | TACE to LR |
| --- | --- | --- | --- | --- | --- | --- |
| Train cohort (298) | Death (156) | Early (41) | 31 | 10 | 0 | 7 |
| Median (43) | 24 | 19 | 9 | 12 |
| Advanced (72) | 29 | 43 | 4 | 31 |
| Survival (142) | Early (84) | 80 | 4 | 0 | 0 |
| Median (37) | 30 | 7 | 2 | 2 |
| Advanced (21) | 13 | 8 | 0 | 4 |
| Test cohort (120) | Death (79) | Early (27) | 13 | 14 | 2 | 4 |
| Median (24) | 13 | 11 | 3 | 6 |
| Advanced (28) | 13 | 15 | 1 | 14 |
| Survival (41) | Early (21) | 11 | 10 | 0 | 0 |
| Median (16) | 6 | 8 | 0 | 3 |
| Advanced (11) | 4 | 2 | 0 | 4 |

**Abbreviations:** TACE, transarterial chemoembolization; LR, Liver resection; CNLC, China Liver Cancer Staging.

**Supplementary Table 8. Univariate and multivariate analyses of predictive characteristics related with survival status in HCC.**

| Characteristics | Univariate | | Multivariate | |
| --- | --- | --- | --- | --- |
| P value | HR(95% CI) | P value | HR(95% CI) |
| Treatment model | <0.001 | 0.366 (0.239-0.562) | <0.001 | 0.399 (0.257-0.619) |
| CNLC | <0.001 | 1.710 (1.390-2.090) |  |  |
| Child Pugh class | 0.001 | 1.830 (1.290-2.590) |  |  |
| ECOG PS | 0.395 | 1.220 (0.772-1.930) |  |  |
| Extrahepatic Metastases | 0.101 | 1.440 (0.932-2.210) |  |  |
| Portal Vein Tumor Thrombus | <0.001 | 2.170 (1.510-3.110) |  |  |
| Gender | 0.141 | 1.470 (0.880-2.460) |  |  |
| HBV infection | 0.062 | 0.671 (0.442-1.020) |  |  |
| Diabetes | 0.869 | 1.050 (0.595-1.850) |  |  |
| ALBI grade | <0.001 | 1.66 0(1.250-2.200) | 0.033 | 1.440 (1.030-2.010) |
| Cirrhosis | 0.054 | 1.400 (0.994-1.980) | 0.045 | 1.420 (0.988-2.030) |
| Tumor location | 0.005 | 1.510 (1.130-2.020) | 0.924 | 1.010 (0.770-1.330) |
| Fusion lesions | <0.001 | 1.950 (1.360-2.800) | 0.267 | 1.350 (0.795-2.290) |
| HCC capsule | 0.015 | 1.240 (1.04-01.480) | 0.359 | 1.110 (0.890-1.380) |
| Intratumoral.necrosis | 0.035 | 1.500 (1.030-2.190) | 0.393 | 1.24 0(0.758-2.020) |
| Arterial peritumoral enhancement | 0.047 | 1.460 (1.010-2.130) | 0.622 | 1.120 (0.717-1.740) |
| Tumor number | <0.001 | 1.400 (1.200-1.630) | 0.018 | 1.230 (1.040-1.460) |
| Tumor.diameter | <0.001 | 1.420 (1.170-1.710) | 0.499 | 0.901 (0.665-1.220) |
| Age | 0.389 | 1.080 (0.909-1.280) |  |  |
| PLT | 0.131 | 1.130 (0.965-1.310) |  |  |
| AST | 0.007 | 1.100 (1.030-1.180) | 0.977 | 1.000 (0.908-1.100) |
| ALT | 0.872 | 1.010 (0.886-1.150) |  |  |
| GGT | 0.004 | 1.330 (1.100-1.620) | 0.029 | 1.230 (1.020-1.480) |
| ALB | <0.001 | 0.740 (0.642-0.852) |  |  |
| TBIL | 0.298 | 0.928 (0.807-1.070) |  |  |
| Scr | 0.161 | 0.865 (0.705-1.060) |  |  |
| PT | 0.968 | 1 .000 (0.817-1.230) |  |  |
| INR | 0.824 | 1.020 (0.831-1.260) |  |  |

**Abbreviations:** ALB, serum albumin; ALBI, albumin-bilirubin; ALT, alanine aminotransferase; AST, aspartate aminotransferase; CNLC, China Liver Cancer Staging; ECOG-PS, Eastern Cooperative Oncology Group performance status; GGT, Glutamyl transpeptidase; HBV, hepatitis B virus; INR, international normalized ratio; PLT, platelet count; PT, prothrombin time; Scr, serum creatinine; and TBIL, total bilirubin.

**supplementary figure**

**
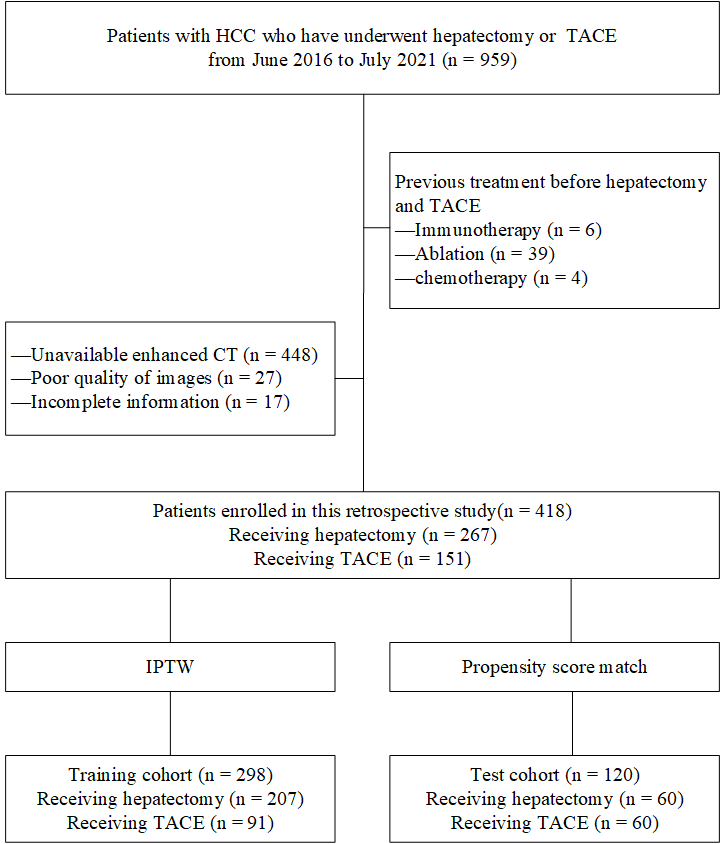
**

Supplementary Figure 1. Flow chart of patient recruitment. HCC, hepatocellular carcinoma; TACE, transcatheter arterial chemoembolization; IPTW, Inverse probability of treatment weighting.


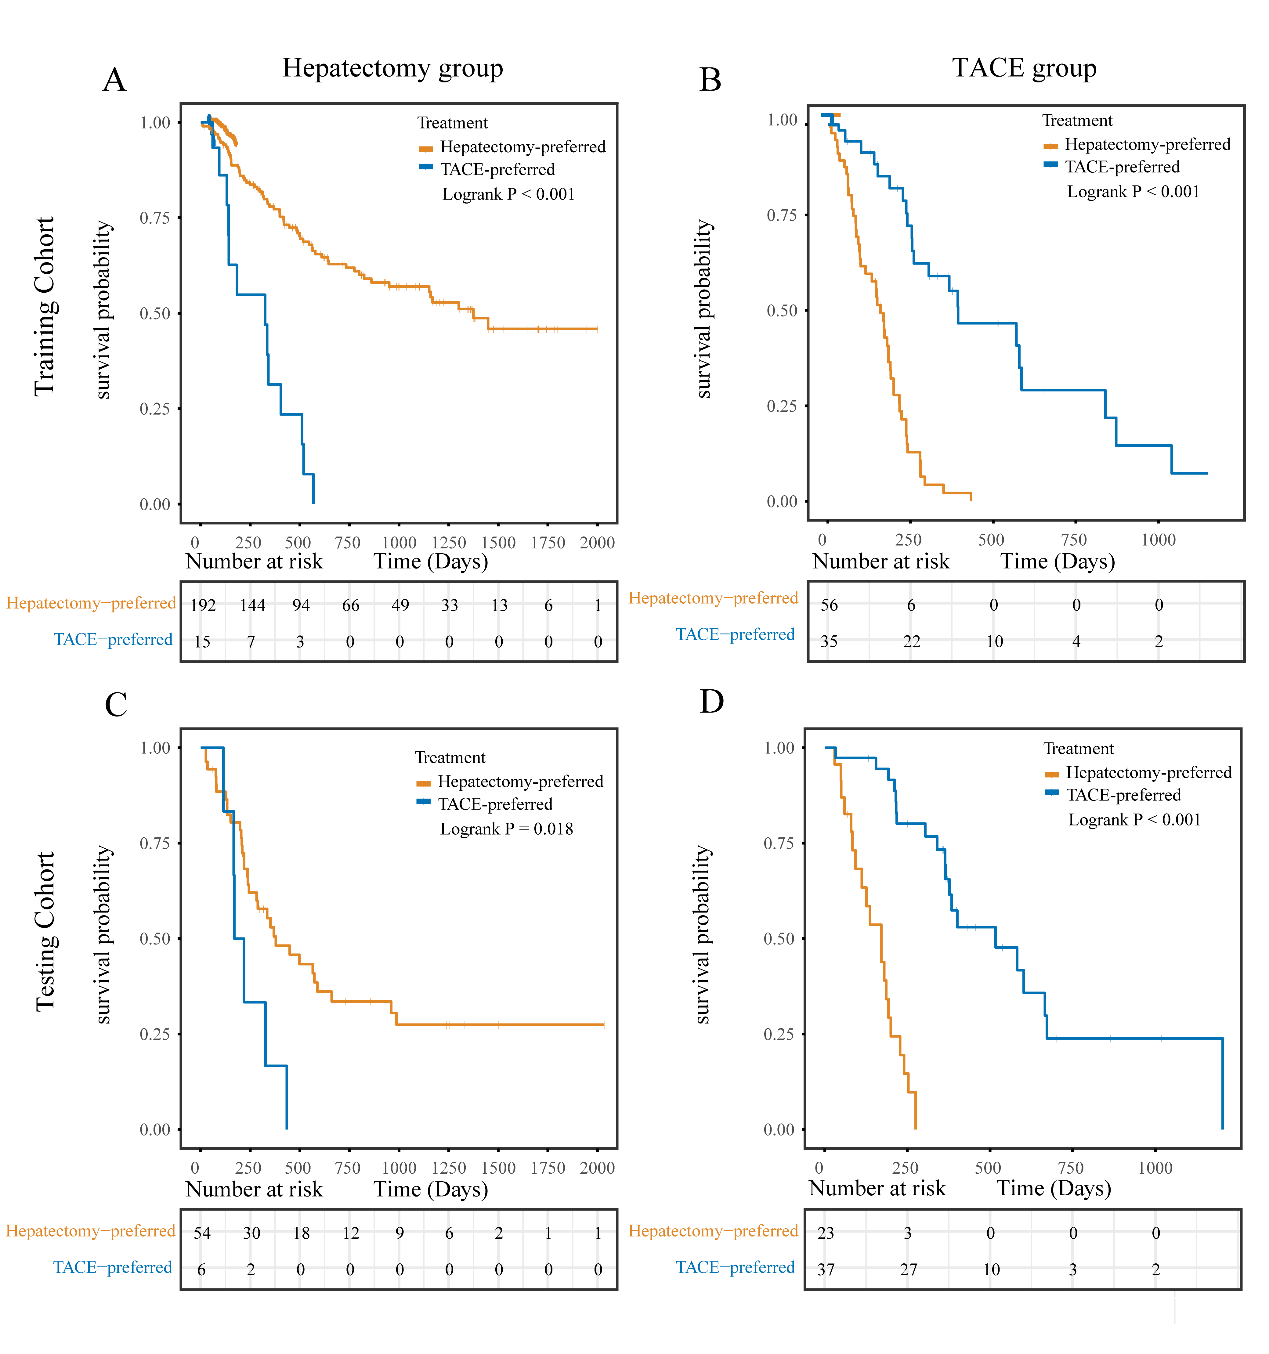


Supplementary Figure 2. Kaplan-Meier curves of prognostic differences between hepatectomy and TACE treatment. Comparisons of the hepatectomy-preferred and TACE-preferred groups in the Hepatectomy group (A), and the TACE group (B) in the training cohort. Comparisons of the hepatectomy-preferred and TACE-preferred in the Hepatectomy group (C), and TACE group (D) in the testing cohort. TACE, transarterial chemoembolization.

Supplementary Figure 3. Results of selected features for the six ROIs. Sky blue bar (left vertical coordinate) indicates the frequency of features selected after 100 RSFs, and red point (right vertical coordinate) indicates the average coefficient of features. Results of selected features for the tumoral ROI of the arterial phases (A). Results of selected features for the tumoral ROI of the portal phases (B). Results of selected features for the peritumoral 3 mm ROI of the arterial phases (C). Results of selected features for the peritumoral 3 mm ROI of the portal phases (D). Results of selected features for the peritumoral 5 mm ROI of the arterial phases (E). Results of selected features for the peritumoral 5 mm ROI of the portal phases (F).


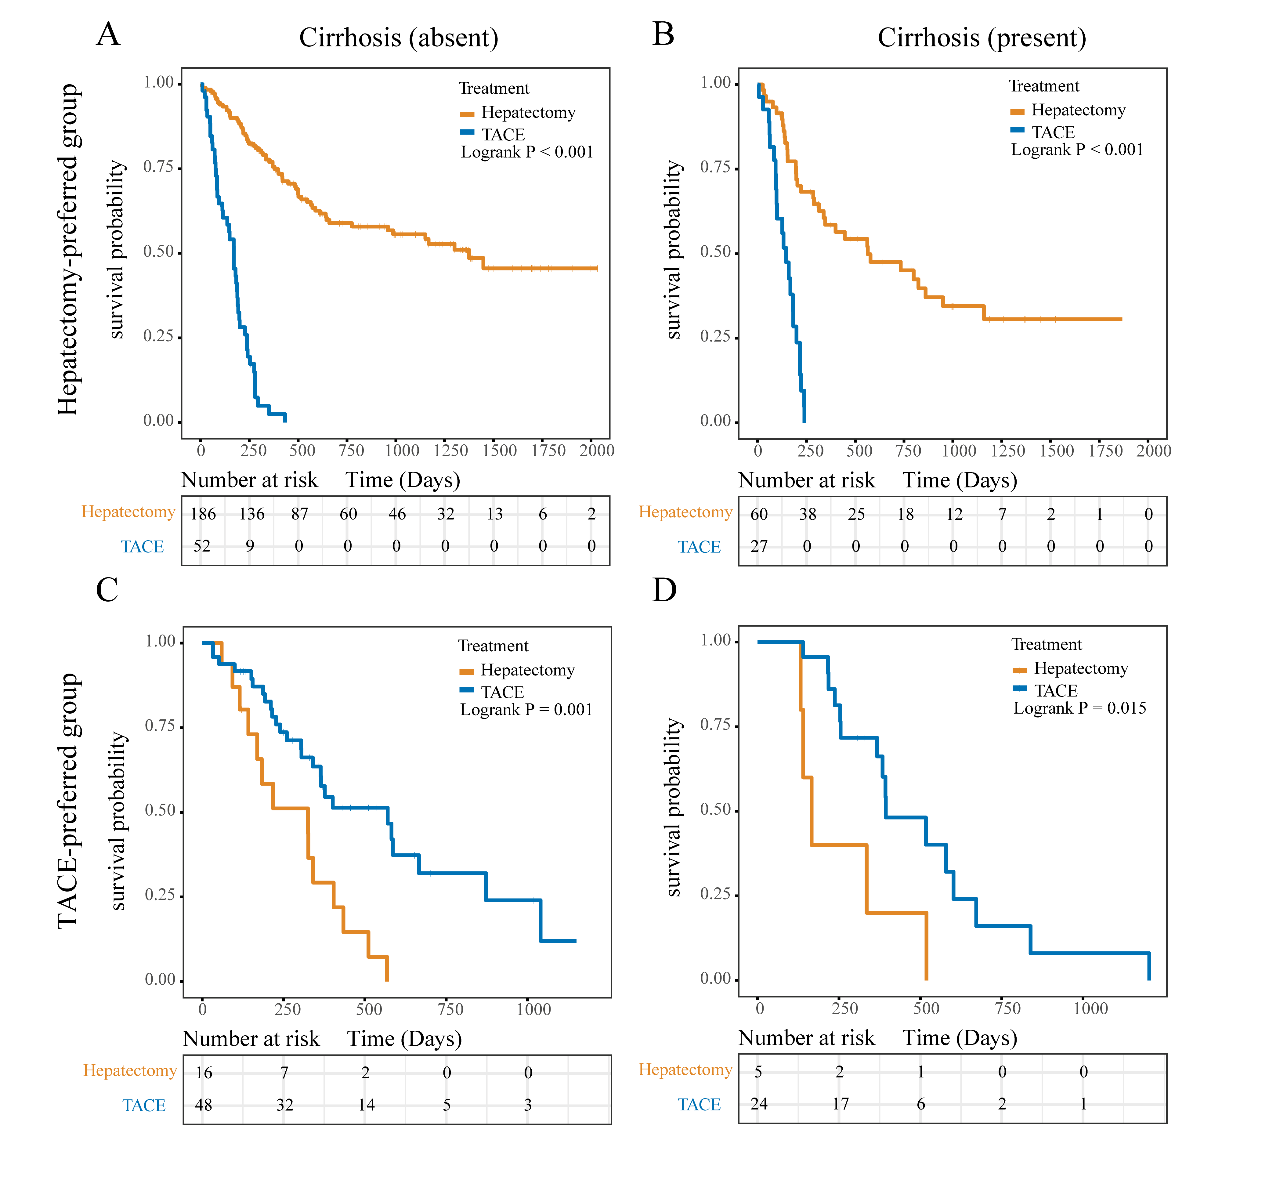


Supplementary Figure 4. Stratified analysis for prognostic differences between hepatectomy and TACE treatment in cirrhosis subgroups. Comparisons of the hepatectomy and TACE groups in the cirrhosis group (A), and the non-cirrhotic group (B) in the Hepatectomy-preferred group. Comparisons of the hepatectomy and TACE groups in the cirrhosis group (C), and non-cirrhotic group (D) in the TACE-preferred group. TACE, transarterial chemoembolization.


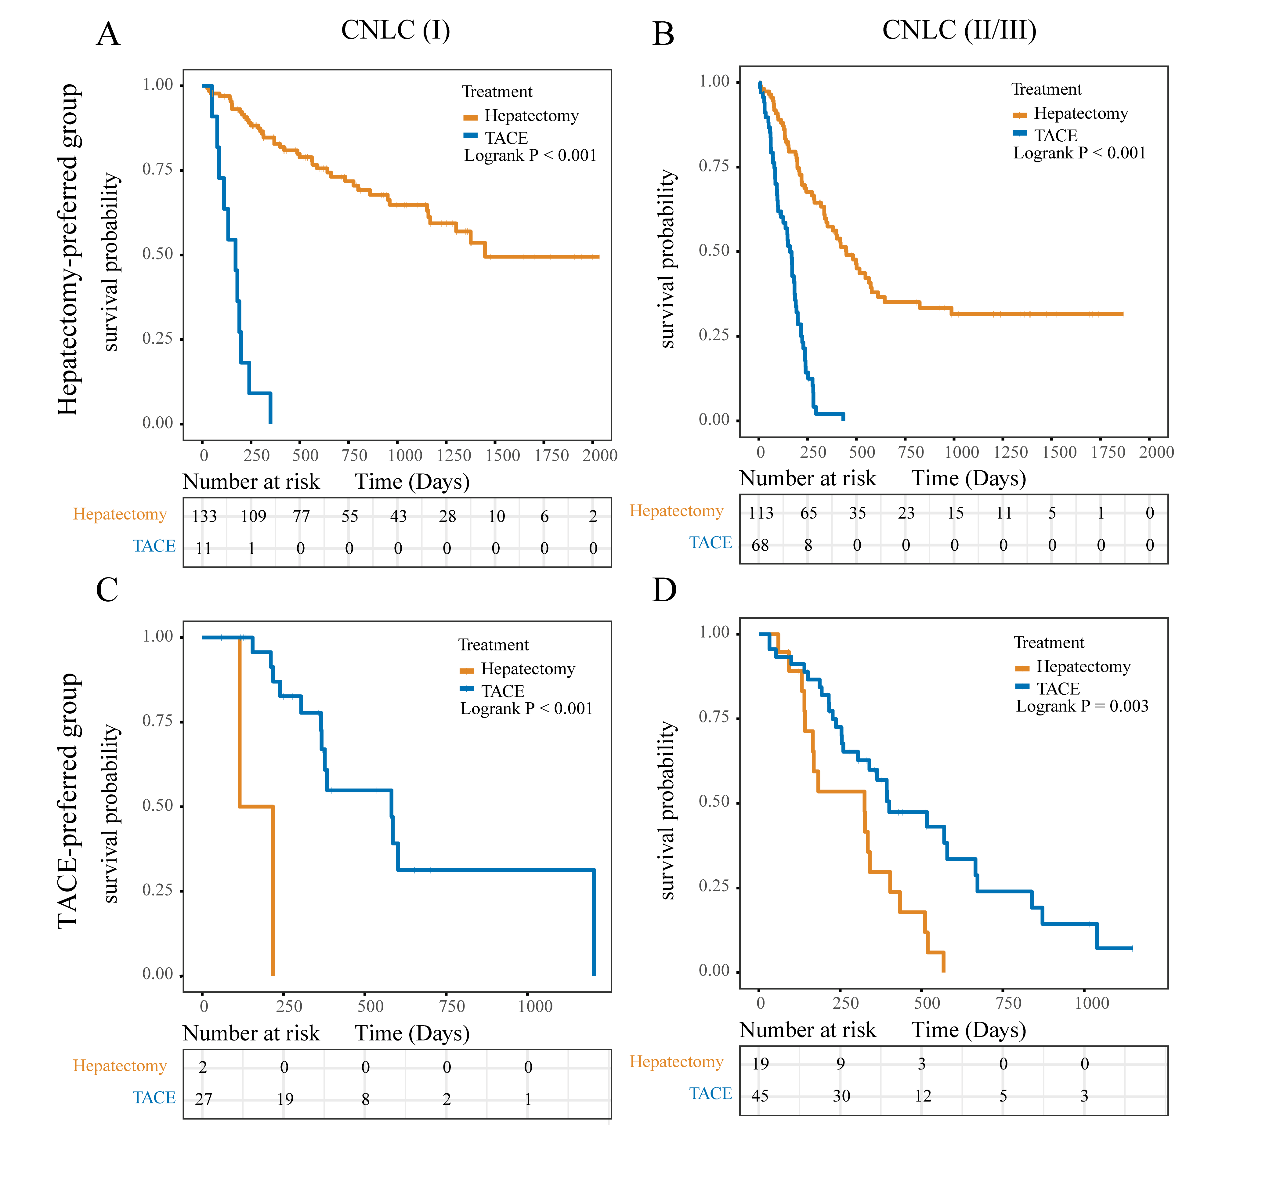


Supplementary Figure 5. Stratified analysis for prognostic differences between hepatectomy and TACE treatment in CNLC subgroups. Comparisons of the hepatectomy and TACE groups in the CNLC-I group (A), and the CNLC-II/III group (B) in the Hepatectomy-preferred group. Comparisons of the hepatectomy and TACE groups in the CNLC-I group (C), and CNLC-II/III group (D) in the TACE-preferred group. TACE, transarterial chemoembolization; CNLC, China Liver Cancer Staging.


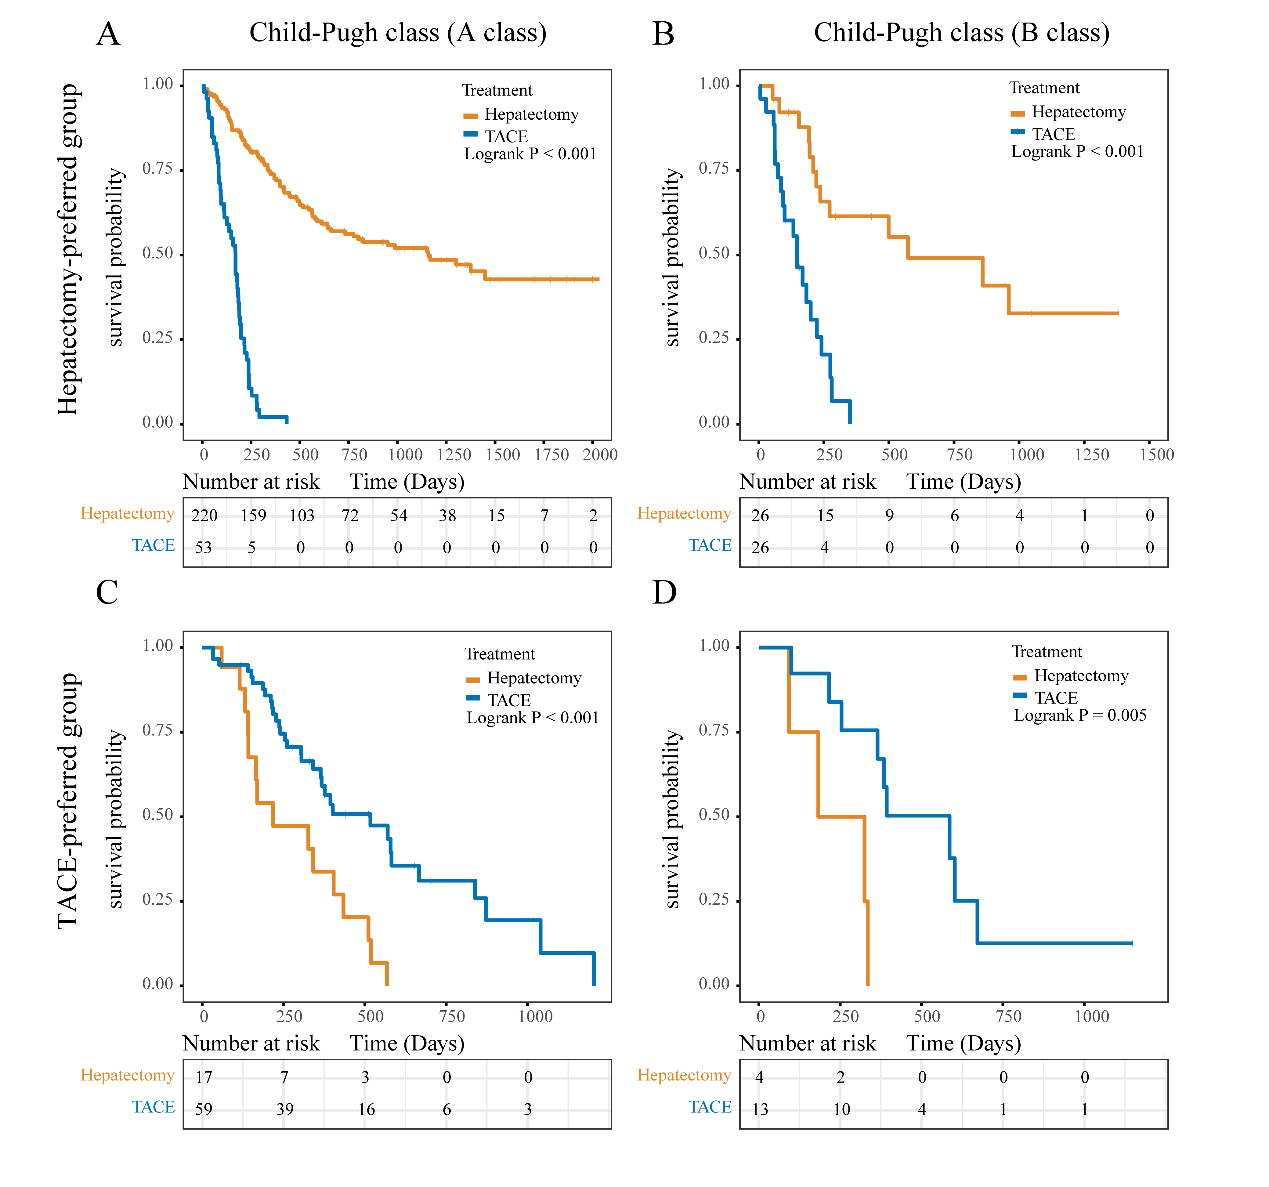


Supplementary Figure 6. Stratified analysis for prognostic differences between hepatectomy and TACE treatment in Child-Pugh subgroups. Comparisons of the hepatectomy and TACE groups in the Child-Pugh-A group (A), and the Child-Pugh-B group (B) in the Hepatectomy-preferred group. Comparisons of the hepatectomy and TACE groups in the Child-Pugh-A group (C), and Child-Pugh-B group (D) in the TACE-preferred group. TACE, transarterial chemoembolization.

**
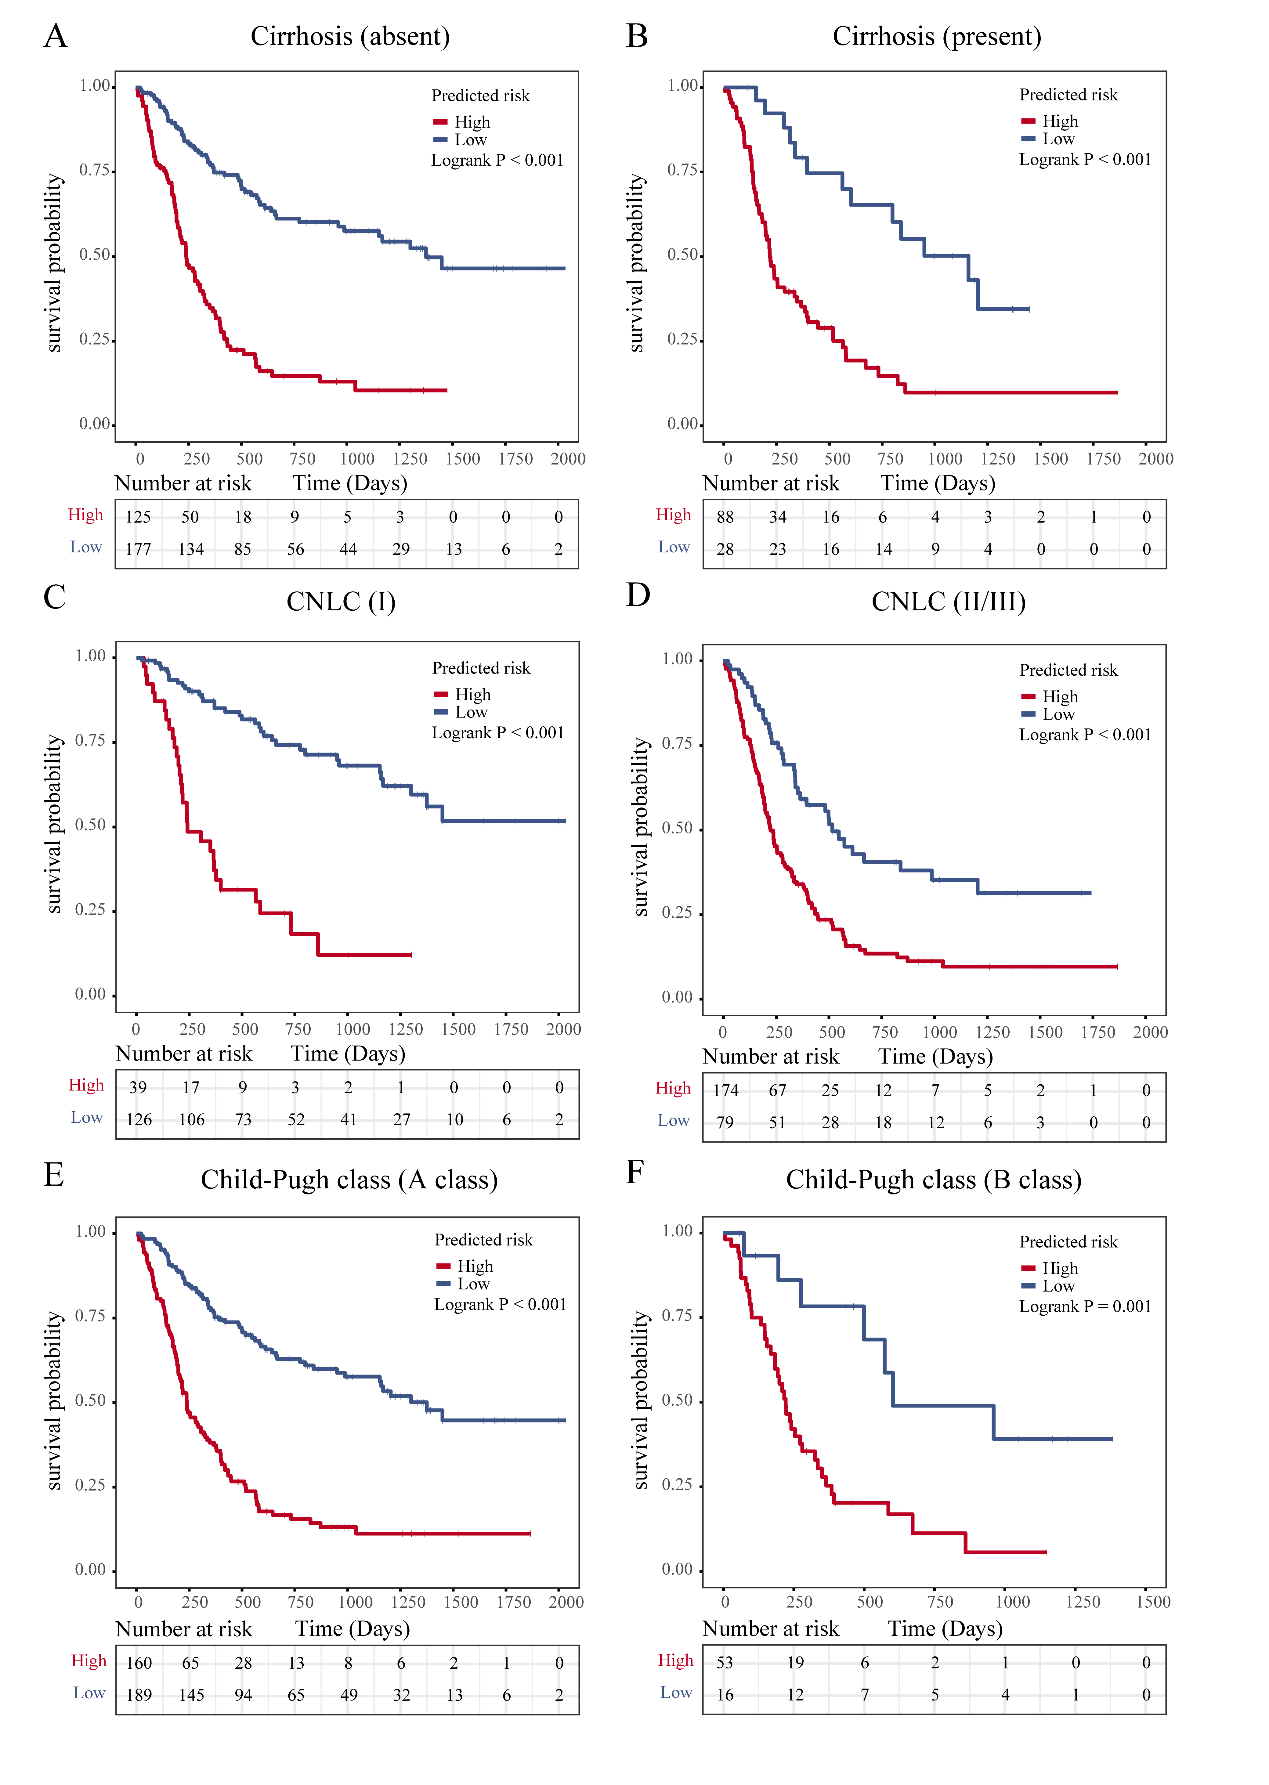
**

Supplementary Figure 7. Stratified analysis of prognostic model for predicting overall survival. Kaplan-Meyer curves for overall survival in the cirrhosis group (A), the non-cirrhotic group (B), the CNLC-I group (C), the CNLC-II/III group (D),the Child-Pugh class A group (E), and the Child-Pugh class B group (F).
